# Supplementary material
Source: MDPI journal article supplement (https://www.mdpi.com/2072-4292/14/19/5028)

## Supplementary Material

**Figure S1:** Modified Gaussian Model (MGM) plots of all the pixel spectra of the cluster found in frs0002a9b2 observation, Figure 5.

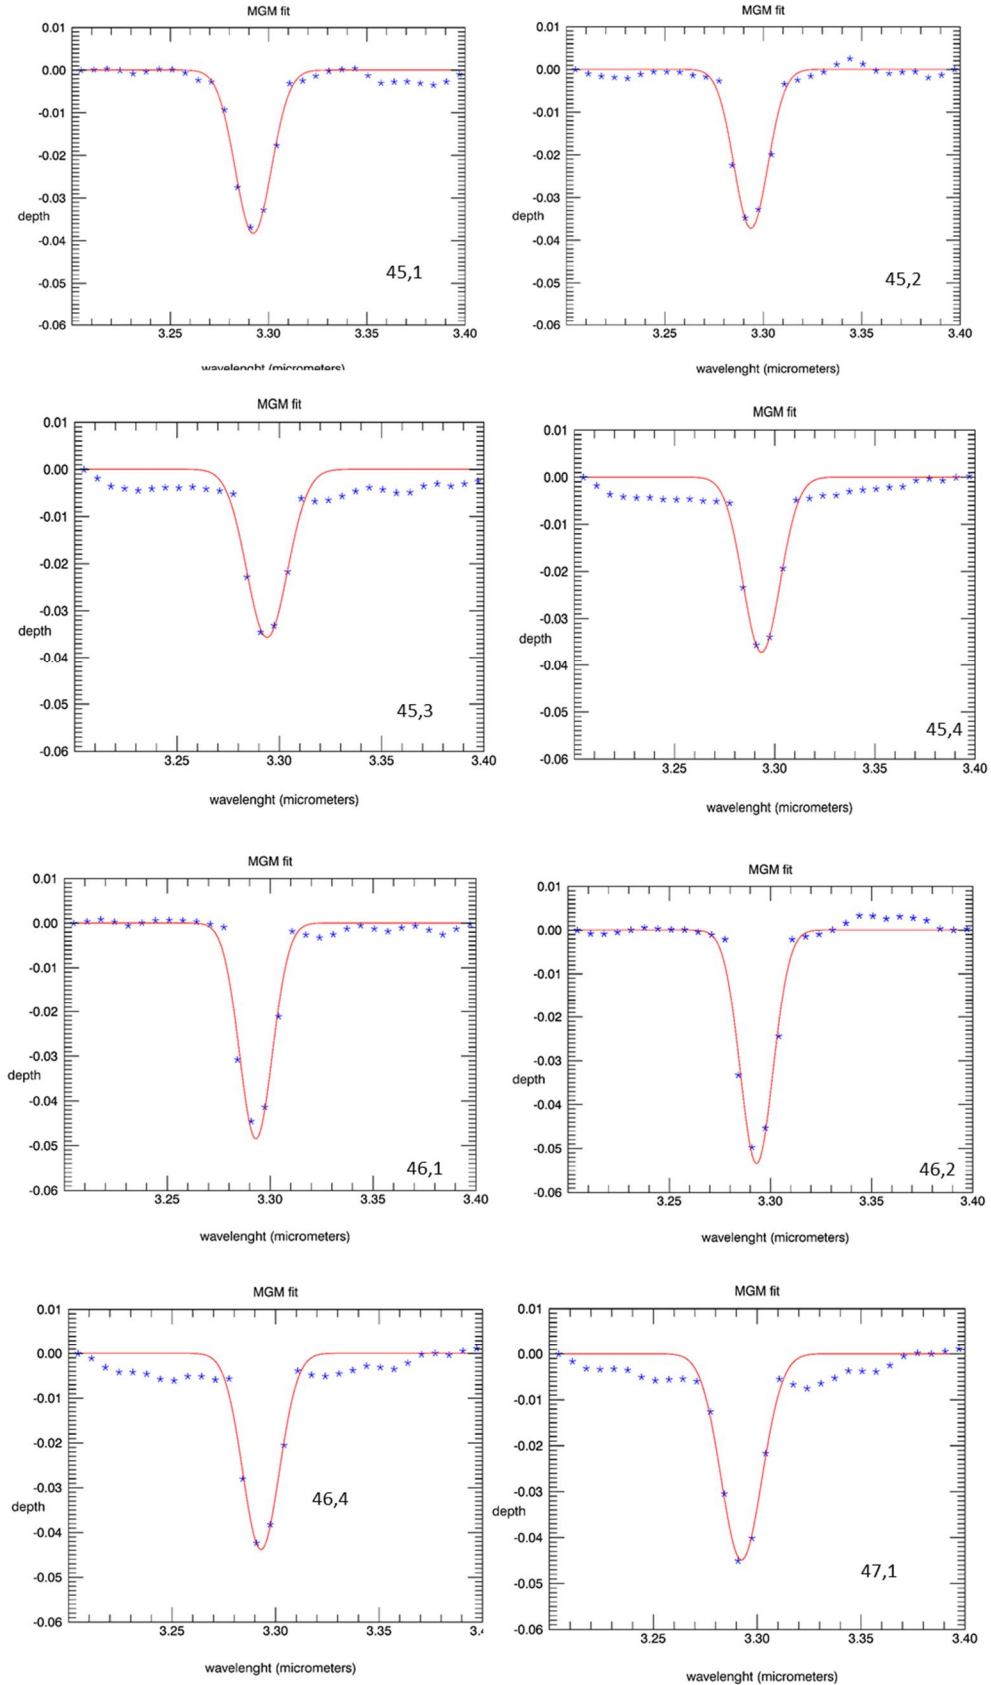

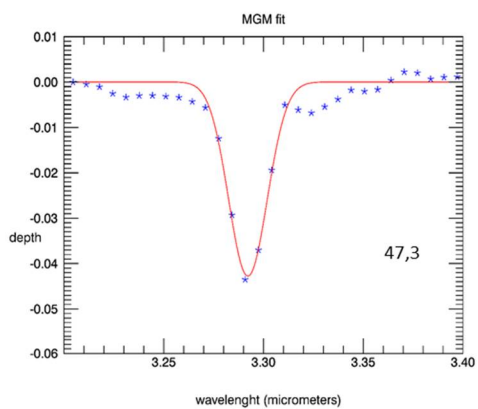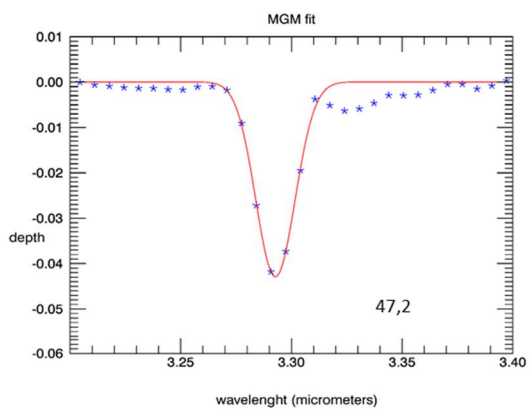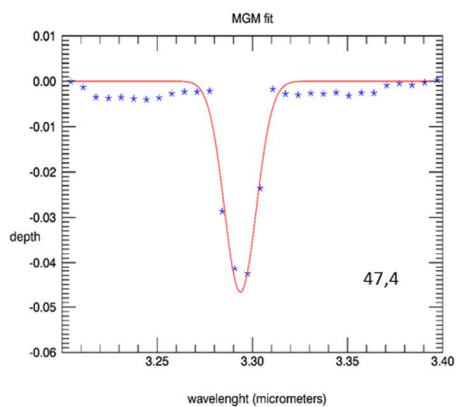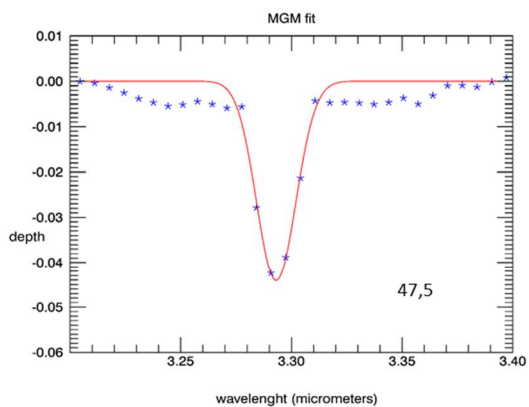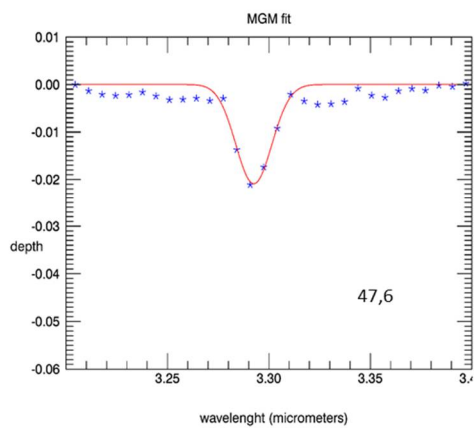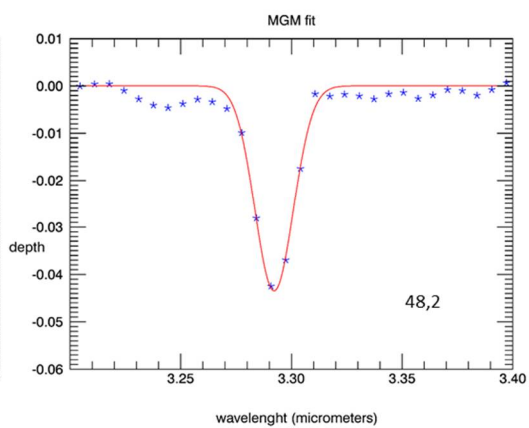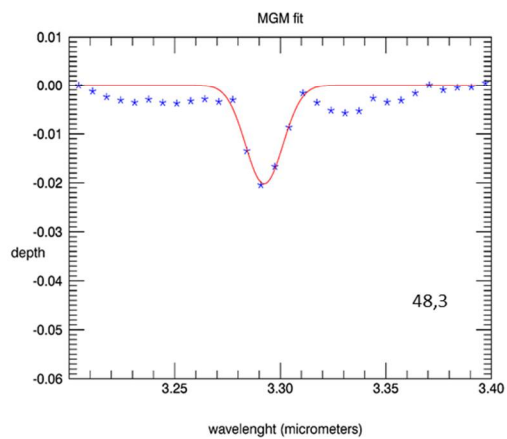

Supplement: s1 [file s1 › Supplementary material-v2.pdf]
